# Supplementary material for: Roles of the Gac-Rsm pathway in the regulation of phenazine biosynthesis in Pseudomonas chlororaphis 30-84
Source: PubMed Central journal article supplement (PMC3684763; doi:10.1002/mbo3.90), 2013-04-21

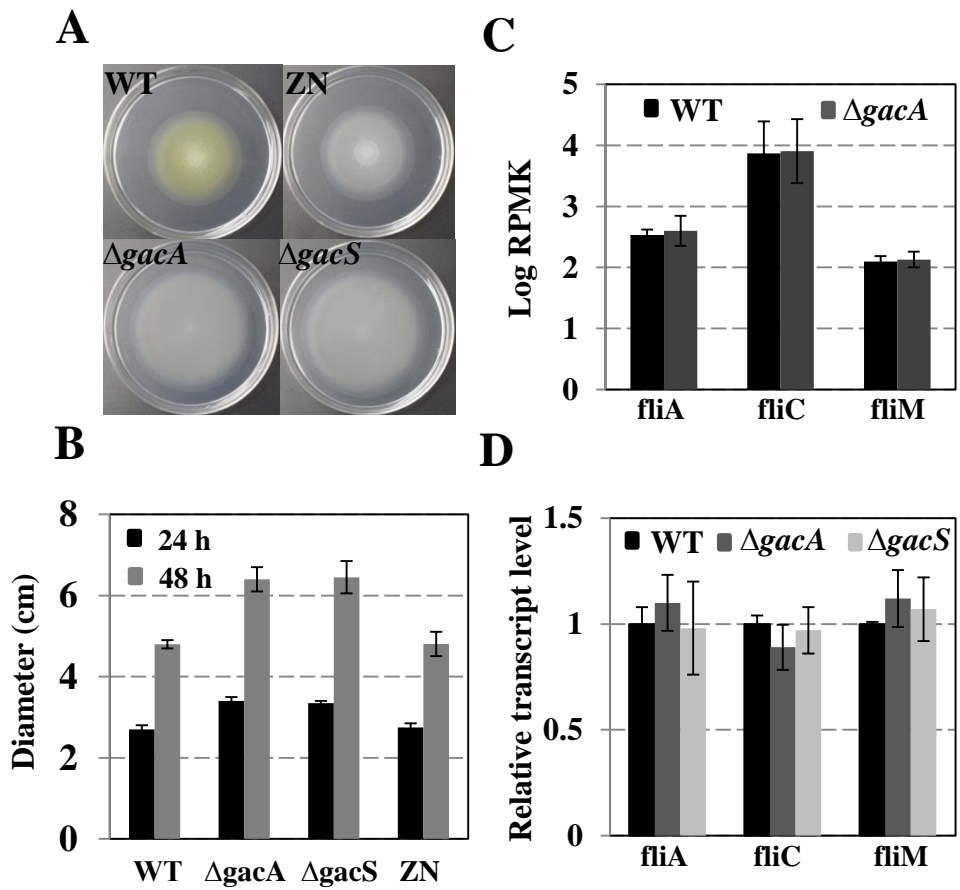

Supplement: mbo30002-0505-SD1.pdf [file mbo30002-0505-SD1.pdf]
